# Supplementary material for: Survivin selective inhibitor YM155 induce apoptosis in SK-NEP-1 Wilms tumor cells
Source: PubMed Central journal article supplement (PMC3543843; doi:10.1186/1471-2407-12-619), 2012-12-26
Supplement: 1471-2407-12-619-S2.pdf [file 1471-2407-12-619-S2.pdf]

Analysis Name: API-YM155 - 2012-08-16 09:14

Analysis Creation Date: 2012-08-16

Build version: 162830

Content version: 12710793 (Release Date: 2012-05-07)

## Analysis settings

### [View](#)

Reference set: Ingenuity Knowledge Base (Genes Only)

Relationship to include: Direct and Indirect

Includes Endogenous Chemicals

Optional Analyses: My Pathways My List

### Filter Summary:

Consider only molecules and/or relationships where

(species = Uncategorized (e.g. chemicals) OR Human) AND

(confidence = Experimentally Observed) AND

(tissues/cell lines = Effector memory helper T cells OR Effector memory cytotoxic T cells OR Vd1 Gamma-delta T cells OR RAW 264.7 OR Activated Vd1 Gamma-delta T cells OR Macrophages OR Activated CD56bright NK cells OR Monocytes OR MOLT-4 OR Other Tissues and Primary Cells OR Prostate Gland OR Effector T cells OR Activated CD56dim NK cells OR SR OR Large Intestine OR Murine NKT cells OR Memory B cells OR Heart OR Natural T-regulatory cells OR Activated Vd2 Gamma-delta T cells OR Kidney OR Naive B cells OR Jurkat OR Plasmacytoid dendritic cells OR Adipose OR CD56bright NK cells OR Mature monocyte-derived dendritic cells OR Monocyte-derived macrophage OR Naive helper T cells OR CD56dim NK cells OR Effector memory RA+ cytotoxic T cells OR Thymus OR Liver OR HL-60 OR Lung OR Activated helper T cells OR Bladder OR Uterus OR Immature monocyte-derived dendritic cells OR BDCA-1+ dendritic cells OR Ovary OR Placenta OR Skeletal Muscle OR THP-1 OR Small Intestine OR BDCA-3+ dendritic cells OR Retina OR Central memory cytotoxic T cells OR

Neutrophils OR Spleen OR Vd2 Gamma-delta T cells OR Salivary Gland OR Stomach OR Cytotoxic T cells OR Epidermis OR Th1 cells OR Central memory helper T cells OR CCRF-CEM OR Th2 cells OR K-562 OR Mammary Gland OR Pancreas OR Testis) AND  
(data sources = BIND OR BIOGRID OR Cogna OR DIP OR Ingenuity Expert Findings OR Ingenuity ExpertAssist Findings OR INTACT OR Interactome studies OR MINT OR MIPS OR TarBase)

## Top Networks

| ID | Associated Network Functions                                        | Score |
|----|---------------------------------------------------------------------|-------|
| 1  | Cell Death, Embryonic Development, Renal Necrosis/Cell Death        | 44    |
| 2  | Cell Death, Tumor Morphology, Cellular Development                  | 25    |
| 3  | Cell Death, Ophthalmic Disease, Developmental Disorder              | 24    |
| 4  | Cell Death, Inflammatory Response, Antigen Presentation             | 20    |
| 5  | Cell Cycle, Cellular Development, Cellular Growth and Proliferation | 18    |

## Top Bio Functions

### Diseases and Disorders

| Name                     | p-value             | # Molecules |
|--------------------------|---------------------|-------------|
| Cancer                   | 2.51E-09 - 6.27E-03 | 51          |
| Hematological Disease    | 2.51E-09 - 6.27E-03 | 22          |
| Gastrointestinal Disease | 4.92E-08 - 6.27E-03 | 24          |
| Hepatic System Disease   | 4.92E-08 - 6.27E-03 | 12          |
| Inflammatory Disease     | 4.92E-08 - 6.27E-03 | 23          |

### Molecular and Cellular Functions

| Name                              | p-value             | # Molecules |
|-----------------------------------|---------------------|-------------|
| Cell Death                        | 5.43E-37 - 6.27E-03 | 65          |
| Cellular Function and Maintenance | 3.07E-11 - 6.27E-03 | 30          |
| Cell Morphology                   | 4.69E-11 - 6.27E-03 | 22          |
| Carbohydrate Metabolism           | 1.27E-10 - 6.27E-03 | 14          |
| Cellular Growth and Proliferation | 1.55E-10 - 6.27E-03 | 32          |

### Physiological System Development and Function

| Name                                          | p-value             | # Molecules |
|-----------------------------------------------|---------------------|-------------|
| Embryonic Development                         | 3.75E-17 - 6.27E-03 | 23          |
| Tumor Morphology                              | 1.29E-06 - 6.27E-03 | 12          |
| Tissue Development                            | 1.60E-05 - 6.27E-03 | 15          |
| Tissue Morphology                             | 1.65E-05 - 4.41E-03 | 8           |
| Hematological System Development and Function | 1.95E-05 - 6.27E-03 | 16          |

## Top Canonical Pathways

| Name                           | p-value  | Ratio          |
|--------------------------------|----------|----------------|
| Death Receptor Signaling       | 3.87E-19 | 14/63 (0.222)  |
| TNFR1 Signaling                | 2.34E-13 | 10/52 (0.192)  |
| Induction of Apoptosis by HIV1 | 2.67E-12 | 10/64 (0.156)  |
| Apoptosis Signaling            | 6.56E-12 | 11/94 (0.117)  |
| Molecular Mechanisms of Cancer | 2.13E-11 | 17/371 (0.046) |

## Top Molecules

### Fold Change up-regulated

| Molecules                     | Exp. Value | Exp. Chart |
|-------------------------------|------------|------------|
| BBC3                          | 1.000      |            |
| BIRC3                         | 1.000      |            |
| BIRC8                         | 1.000      |            |
| BNIP1                         | 1.000      |            |
| CASP7                         | 1.000      |            |
| CASP9 (includes EG:100140945) | 1.000      |            |
| CD5                           | 1.000      |            |
| CDKN1A                        | 1.000      |            |
| CEBPG                         | 1.000      |            |
| COL4A3                        | 1.000      |            |

### Fold Change down-regulated

| Molecules | Exp. Value | Exp. Chart |
|-----------|------------|------------|
| ZNF443    | -1.000     |            |
| UTP11L    | -1.000     |            |
| TP73      | -1.000     |            |

|                          |        |
|--------------------------|--------|
| TNFSF10                  | -1.000 |
| TNFRSF1B                 | -1.000 |
| TNFRSF25                 | -1.000 |
| TIAF1                    | -1.000 |
| STK17A                   | -1.000 |
| SST                      | -1.000 |
| SPP1 (includes EG:20750) | -1.000 |

### Top Upstream Regulators

| Upstream Regulator       | p-value of overlap | Predicted Activation State |
|--------------------------|--------------------|----------------------------|
| NR3C1                    | 1.99E-24           | Inhibited                  |
| TP53 (includes EG:22059) | 3.37E-16           |                            |
| dexamethasone            | 1.65E-13           |                            |
| TNF                      | 3.44E-13           | Activated                  |
| Akt                      | 3.90E-13           |                            |

## Top My Lists

| Name                           | p-value  | Ratio        |
|--------------------------------|----------|--------------|
| BIOMARKERS HNC and mouse HPV16 | 4.65E-01 | 1/100 (0.01) |

## Top My Pathways

| Name                                    | p-value  | Ratio         |
|-----------------------------------------|----------|---------------|
| IL24 pic                                | 3.36E-03 | 3/54 (0.056)  |
| FASN malignancy pathway                 | 1.84E-02 | 3/143 (0.021) |
| Merged networks                         | 8.23E-02 | 2/268 (0.007) |
| NRF2-mediated Oxidative Stress Response | 2.89E-01 | 1/84 (0.012)  |

## Top Tox Lists

| Name                                                                         | p-value  | Ratio          |
|------------------------------------------------------------------------------|----------|----------------|
| Renal Necrosis/Cell Death                                                    | 2.42E-18 | 24/368 (0.065) |
| Pro-Apoptosis                                                                | 6.83E-14 | 10/42 (0.238)  |
| Anti-Apoptosis                                                               | 2.43E-13 | 9/32 (0.281)   |
| Liver Necrosis/Cell Death                                                    | 1.26E-11 | 15/232 (0.065) |
| Decreases Transmembrane Potential of Mitochondria and Mitochondrial Membrane | 1.55E-11 | 11/95 (0.116)  |

## Top Tox Functions

### Assays: Clinical Chemistry and Hematology

| Name                    | p-value             | # Molecules |
|-------------------------|---------------------|-------------|
| Increased Levels of CRP | 1.25E-02 - 1.25E-02 | 1           |
| Increased Levels of LDH | 4.31E-02 - 4.31E-02 | 1           |

### Cardiotoxicity

| Name                        | p-value             | # Molecules |
|-----------------------------|---------------------|-------------|
| Cardiac Necrosis/Cell Death | 1.25E-03 - 6.10E-02 | 4           |
| Cardiac Damage              | 6.27E-03 - 6.27E-03 | 1           |
| Cardiac Hypertrophy         | 1.25E-02 - 4.36E-02 | 3           |
| Cardiac Inflammation        | 1.25E-02 - 1.25E-02 | 1           |
| Cardiac Stress Response     | 1.25E-02 - 1.25E-02 | 1           |

### Hepatotoxicity

| Name                                 | p-value             | # Molecules |
|--------------------------------------|---------------------|-------------|
| Liver Necrosis/Cell Death            | 3.16E-08 - 6.69E-02 | 7           |
| Liver Cirrhosis                      | 3.73E-05 - 1.35E-04 | 7           |
| Liver Proliferation                  | 3.89E-05 - 2.48E-02 | 4           |
| Hepatocellular Carcinoma             | 3.87E-03 - 1.15E-02 | 8           |
| Liver Hyperplasia/Hyperproliferation | 3.87E-03 - 1.15E-02 | 8           |

### Nephrotoxicity

| Name                      | p-value             | # Molecules |
|---------------------------|---------------------|-------------|
| Renal Necrosis/Cell Death | 2.42E-17 - 5.51E-02 | 23          |
| Renal Proliferation       | 4.96E-04 - 1.49E-01 | 4           |
| Glomerular Injury         | 6.27E-03 - 6.27E-03 | 1           |

Renal Inflammation

1.25E-02 - 3.93E-01 3

Renal Nephritis

1.25E-02 - 3.93E-01 3
